# Supplementary material for: The risks of cancer development in systemic lupus erythematosus (SLE) patients: a systematic review and meta-analysis
Source: Springer Nature journal article supplement (doi:10.1186/s13075-018-1760-3), 2018-12-01

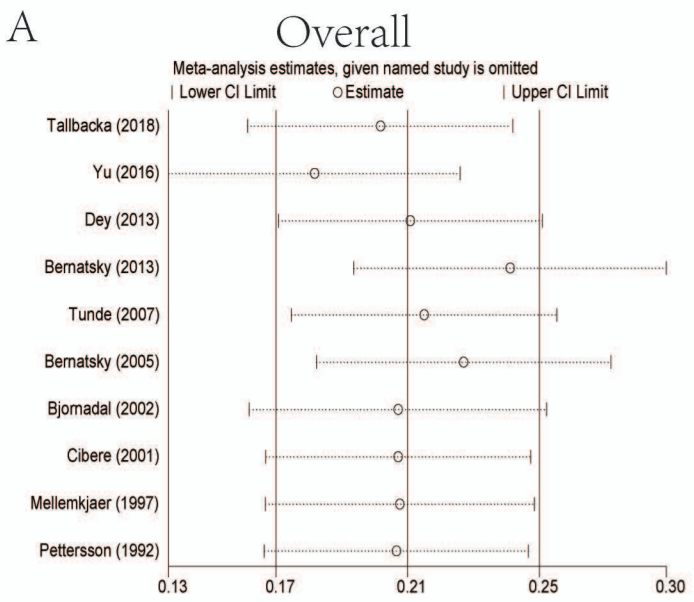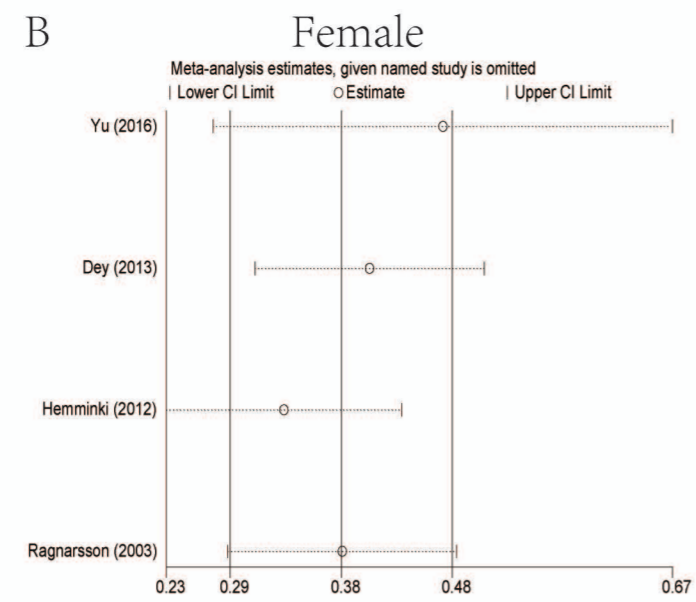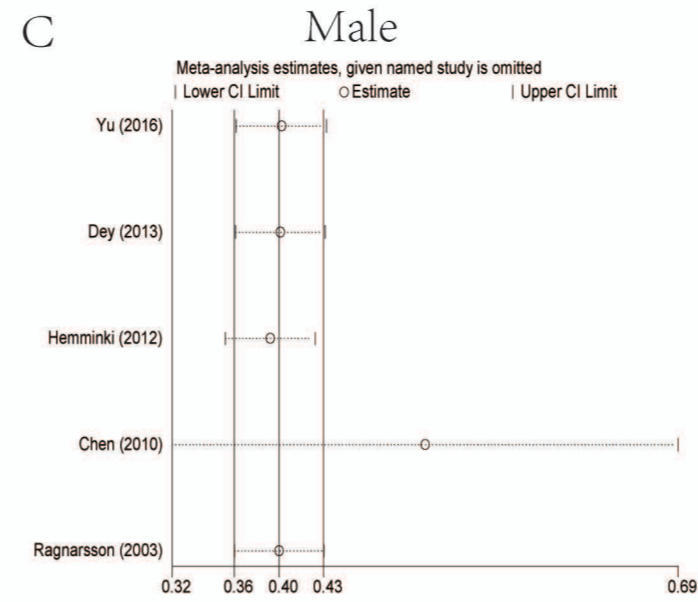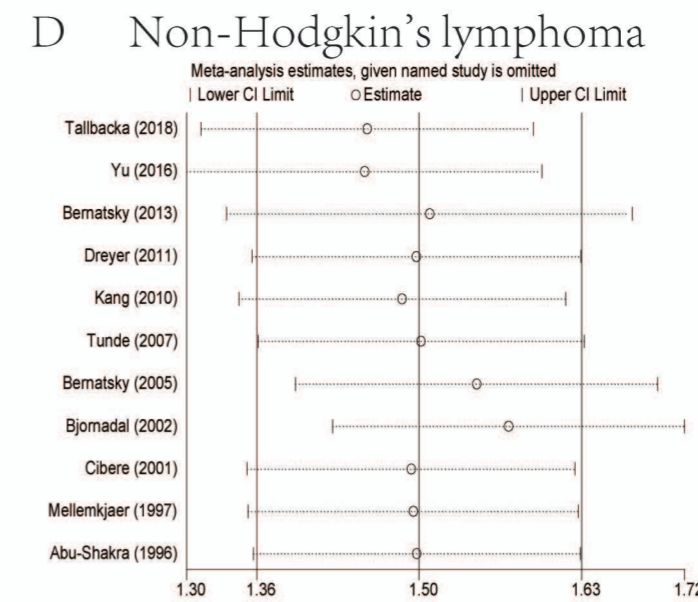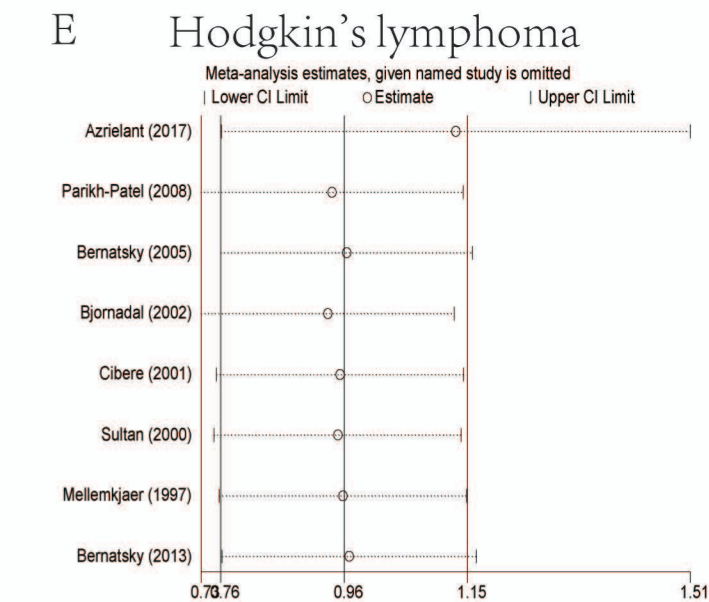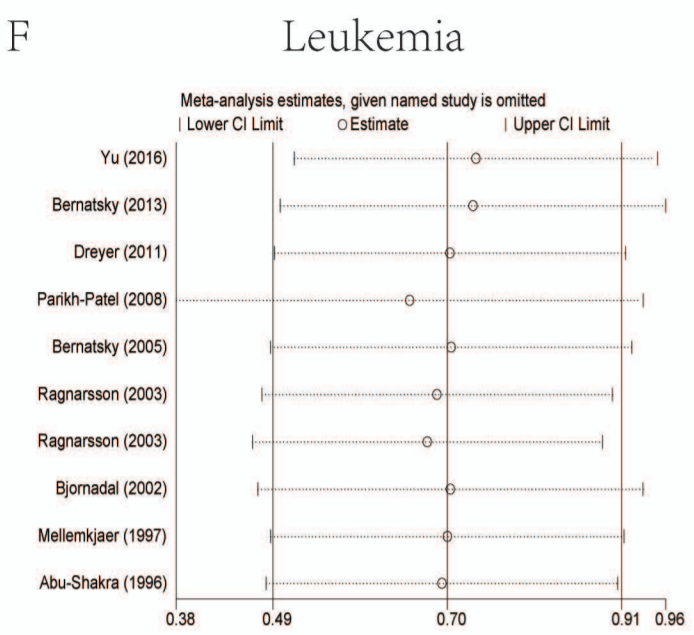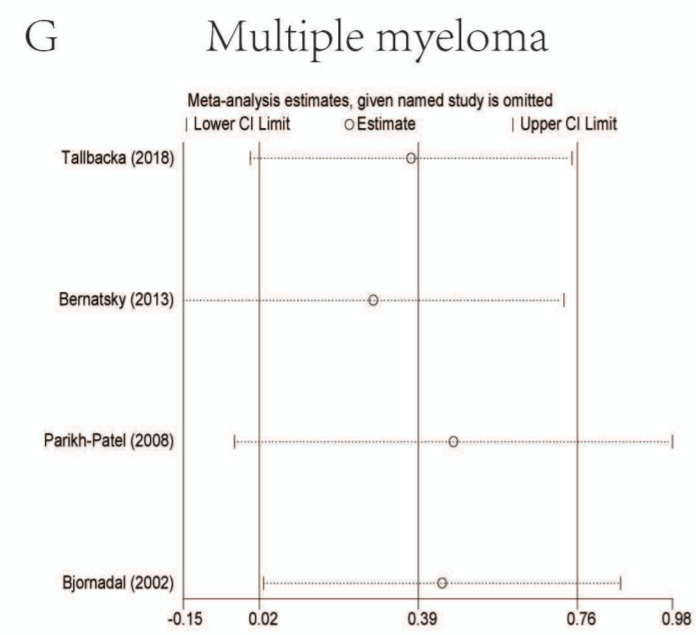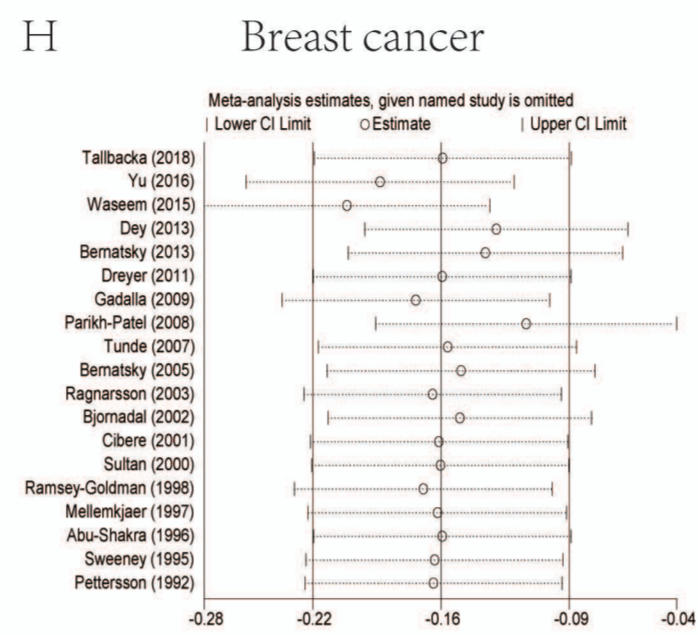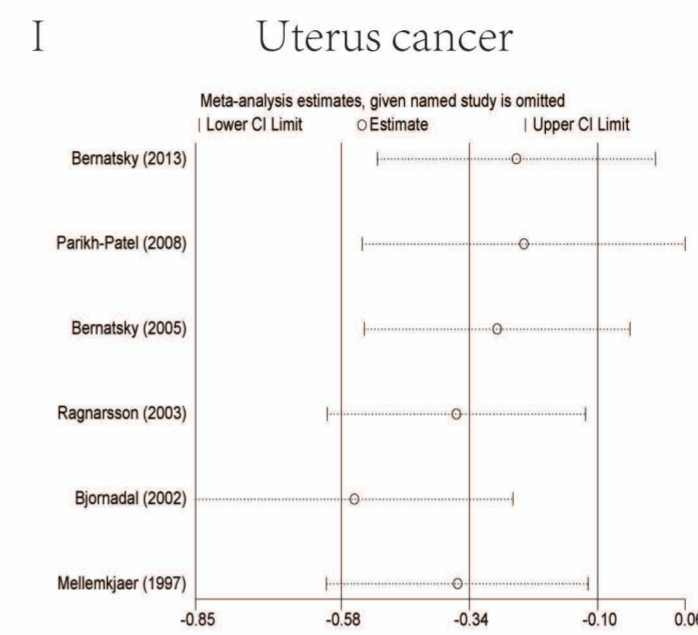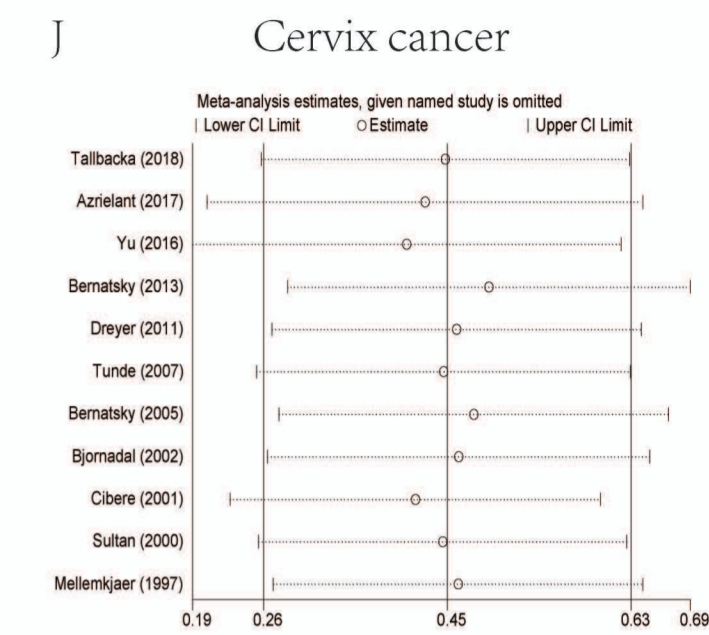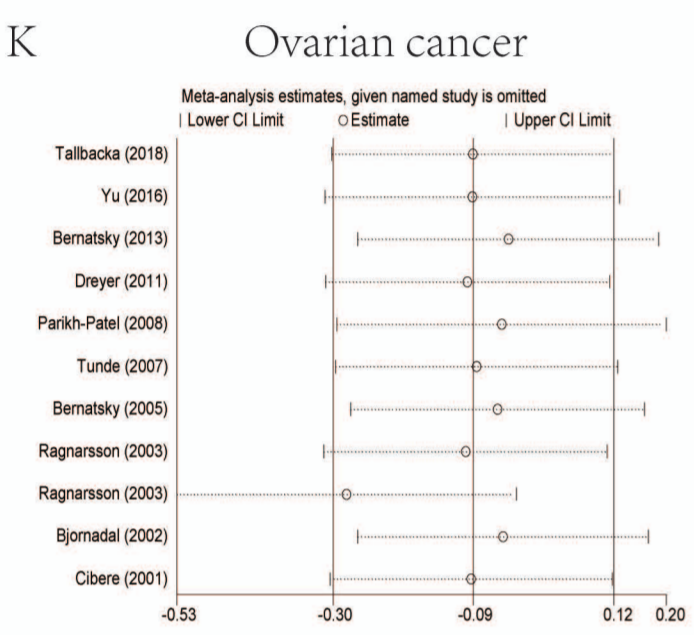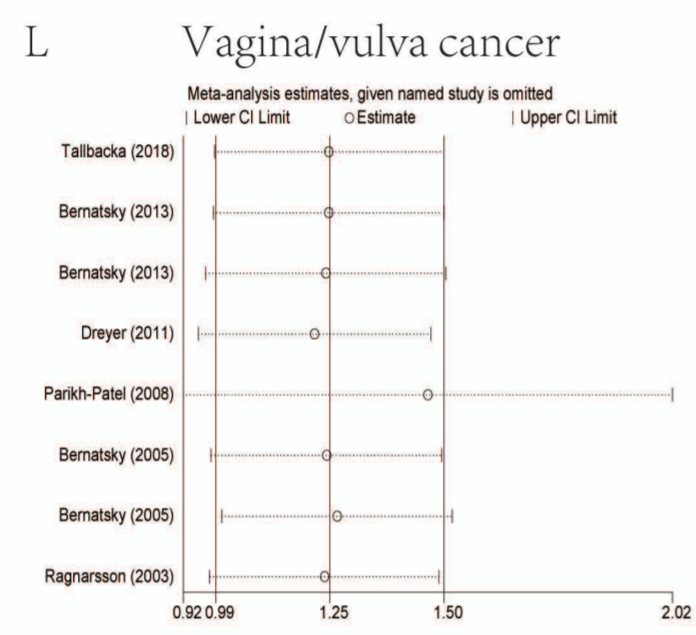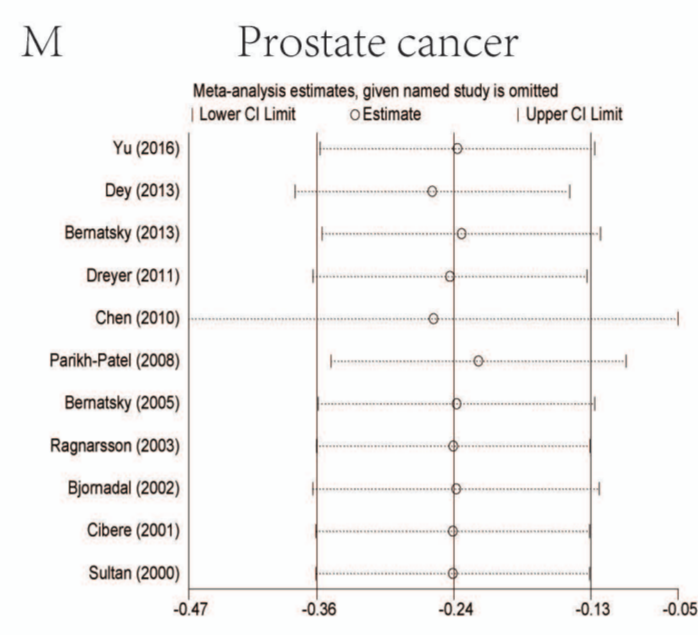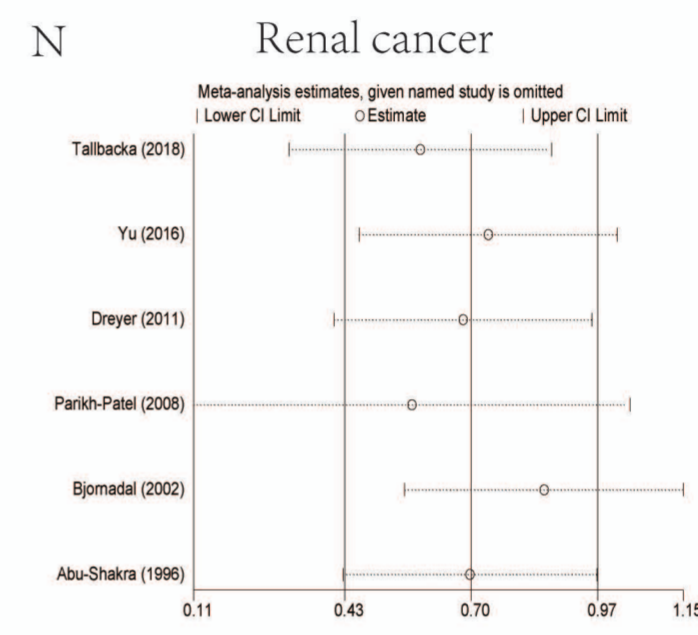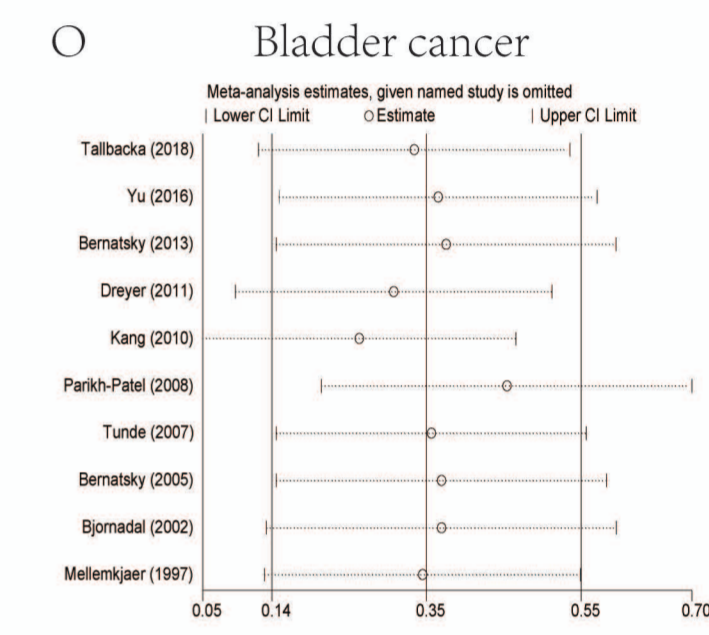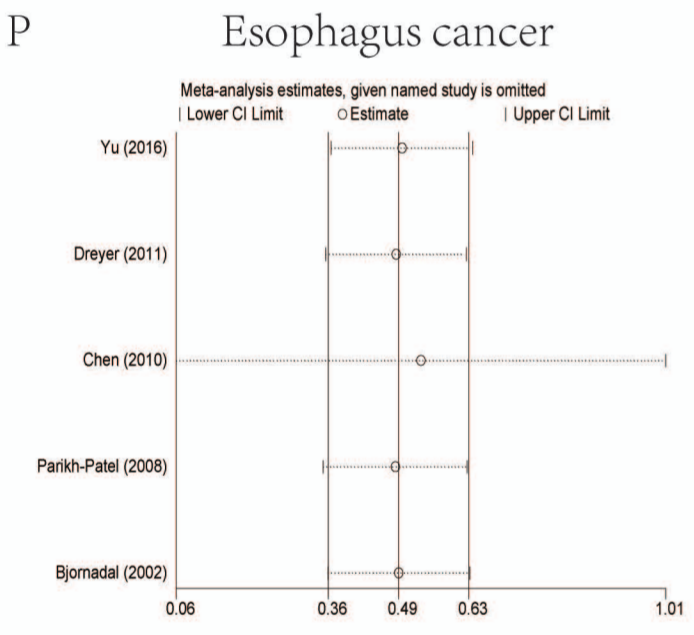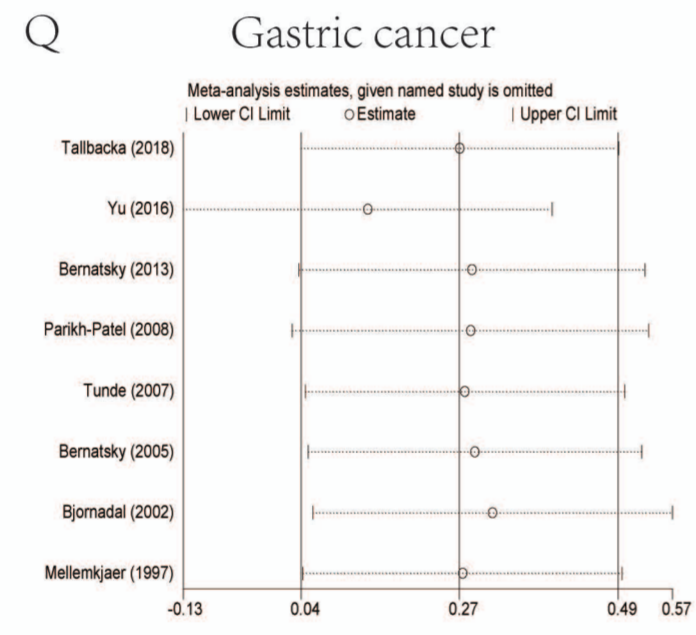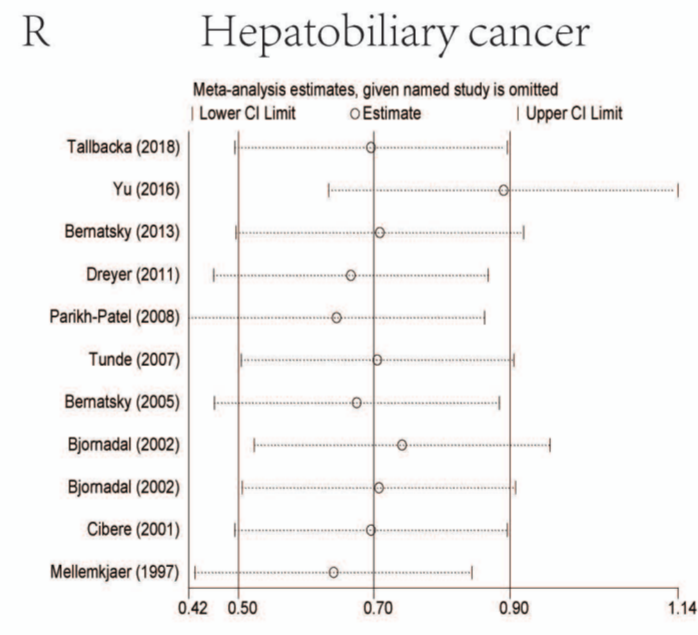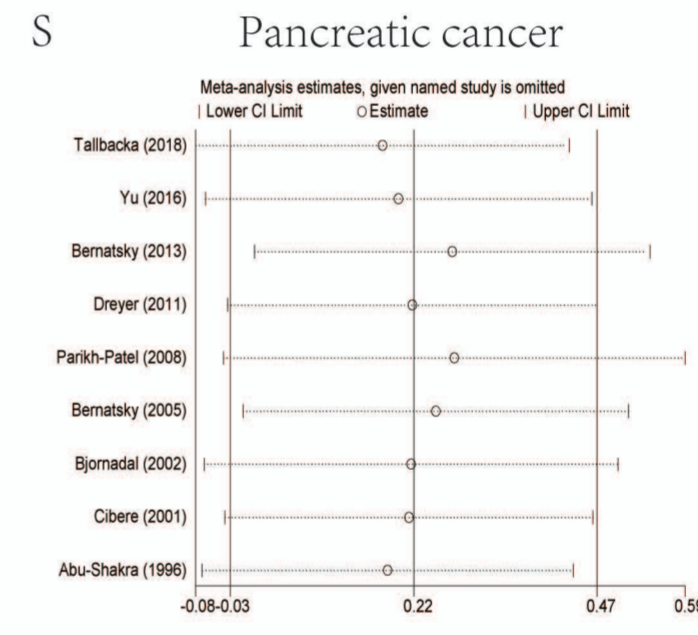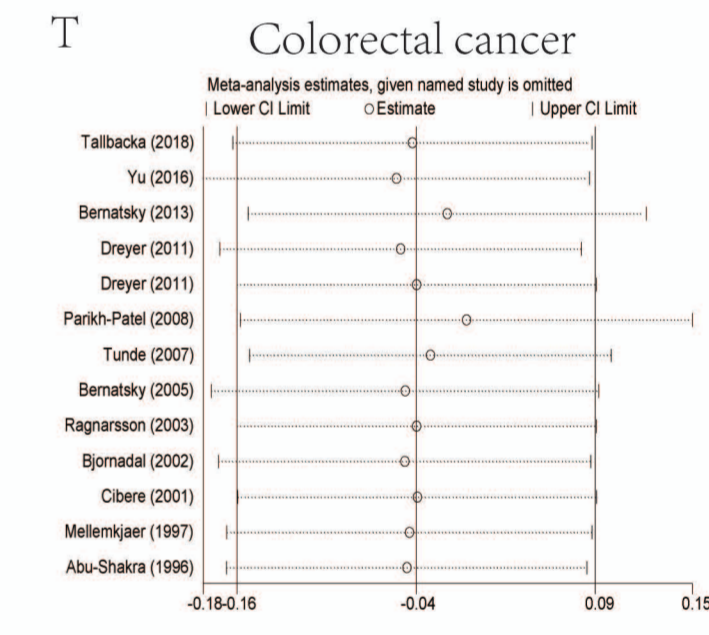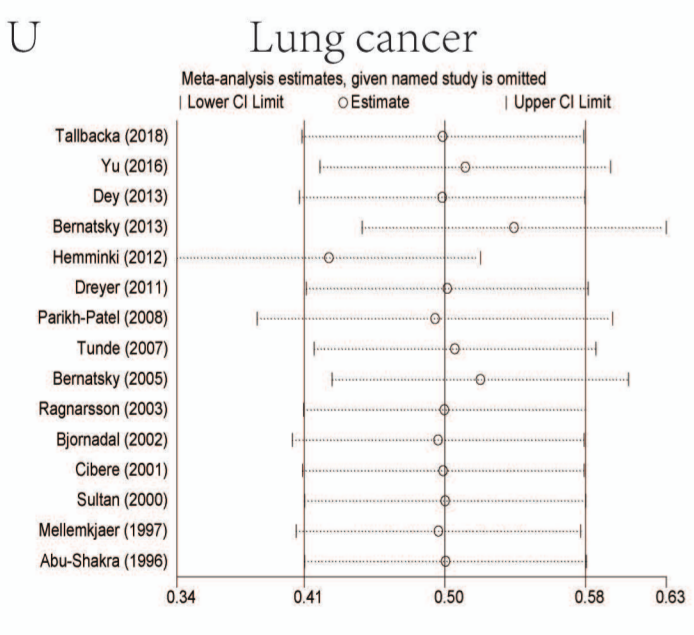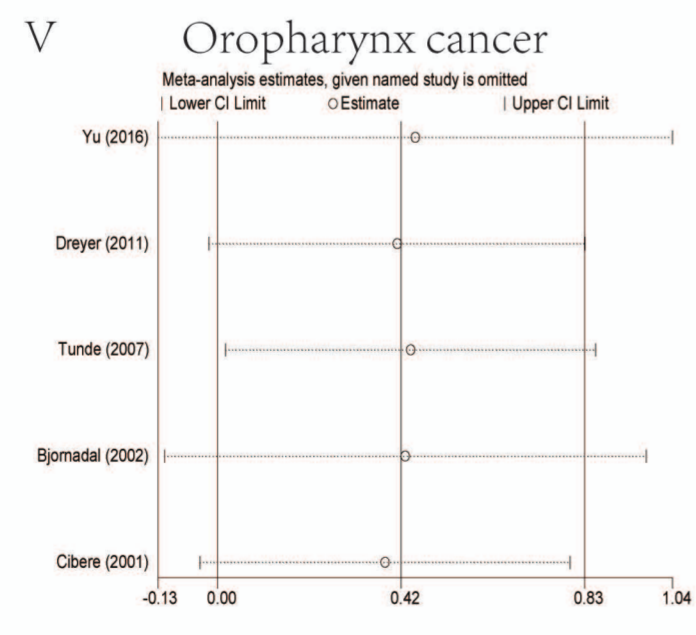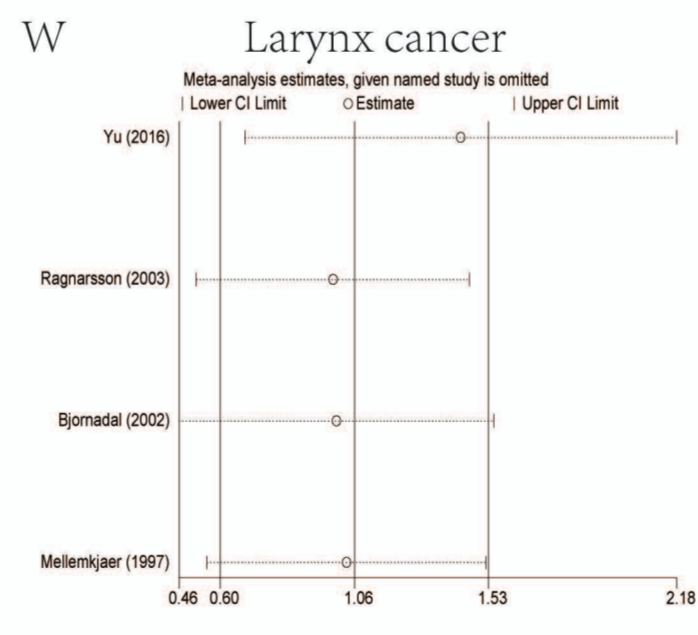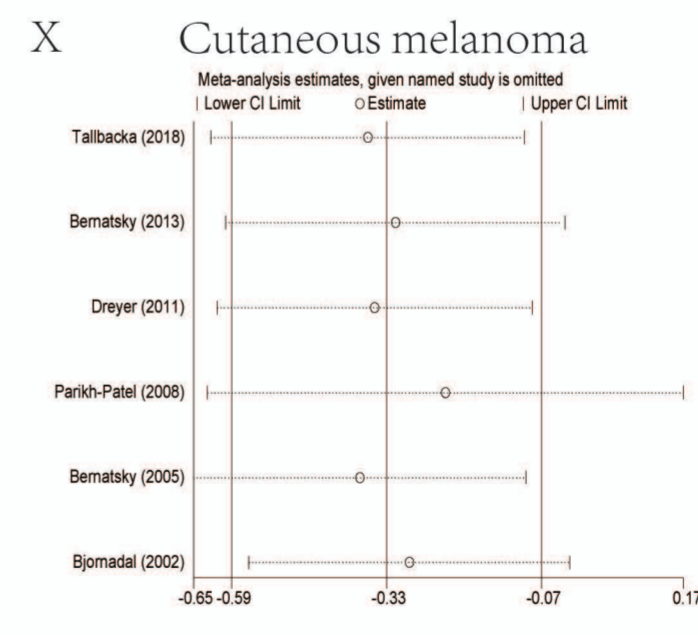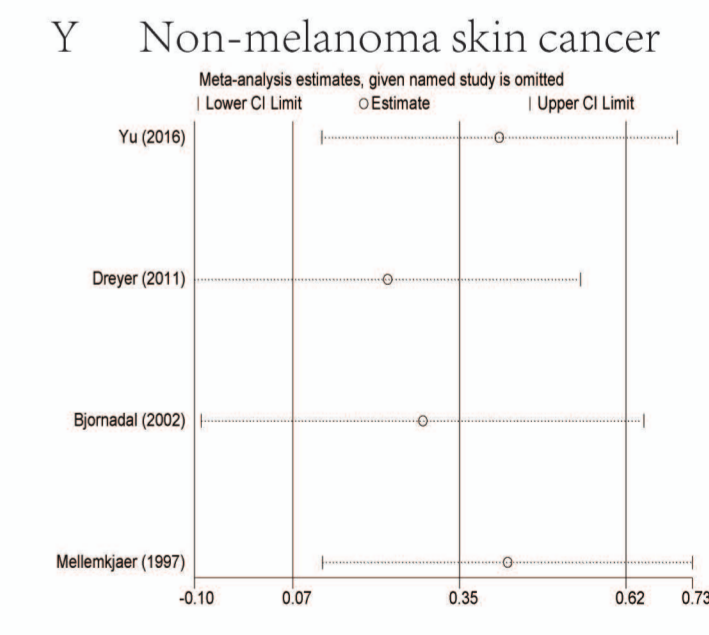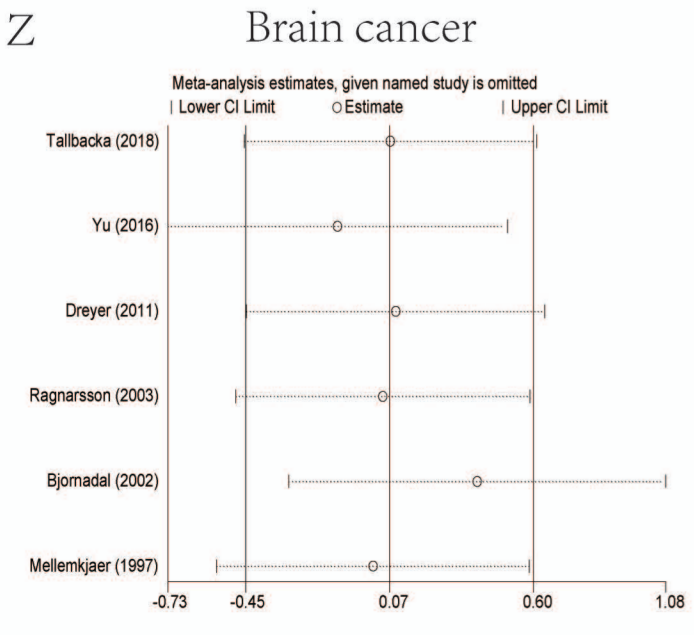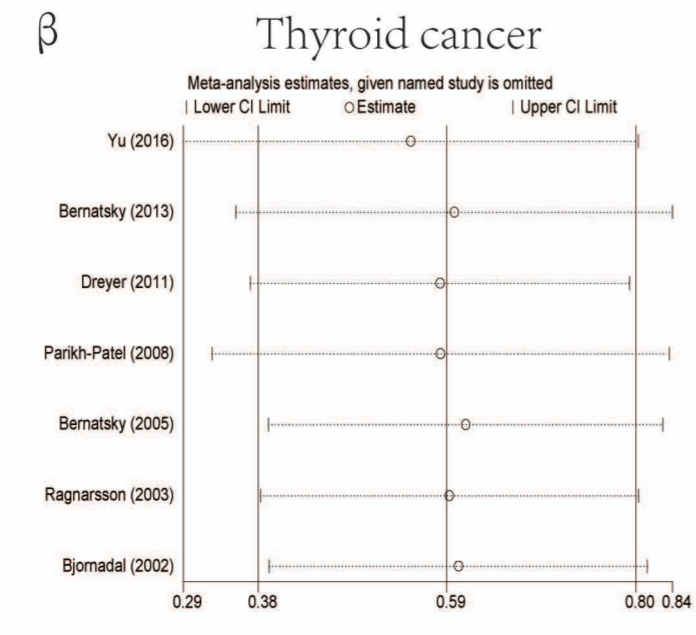

Supplement: MOESM3 [file 16320274]
