# Supplementary material for: The risks of cancer development in systemic lupus erythematosus (SLE) patients: a systematic review and meta-analysis
Source: PubMed Central journal article supplement (PMC6282326; doi:10.1186/s13075-018-1760-3), 2018-12-06
Supplement: 13075_2018_1760_MOESM1_ESM.pdf [file 13075_2018_1760_MOESM1_ESM.pdf]

Identification

Screening

Eligibility

Included

Potential relevant records identified through database searching  
(Total n = 2,019;  
Pubmed = 726;  
Emabse = 1,095;  
Web of science = 198)

Records after duplicates removed  
(n = 1,627)

Records screened  
(n = 1,352)

Records excluded  
(n = 639)

Full-text articles assessed  
for eligibility  
(n = 713)

Full-text articles excluded,  
with reasons  
(n = 689)

Studies included in  
qualitative synthesis  
(n = 24)

Studies included in  
quantitative synthesis  
(meta-analysis)  
(n = 24)
