# Supplementary material for: The risks of cancer development in systemic lupus erythematosus (SLE) patients: a systematic review and meta-analysis
Source: PubMed Central journal article supplement (PMC6282326; doi:10.1186/s13075-018-1760-3), 2018-12-06

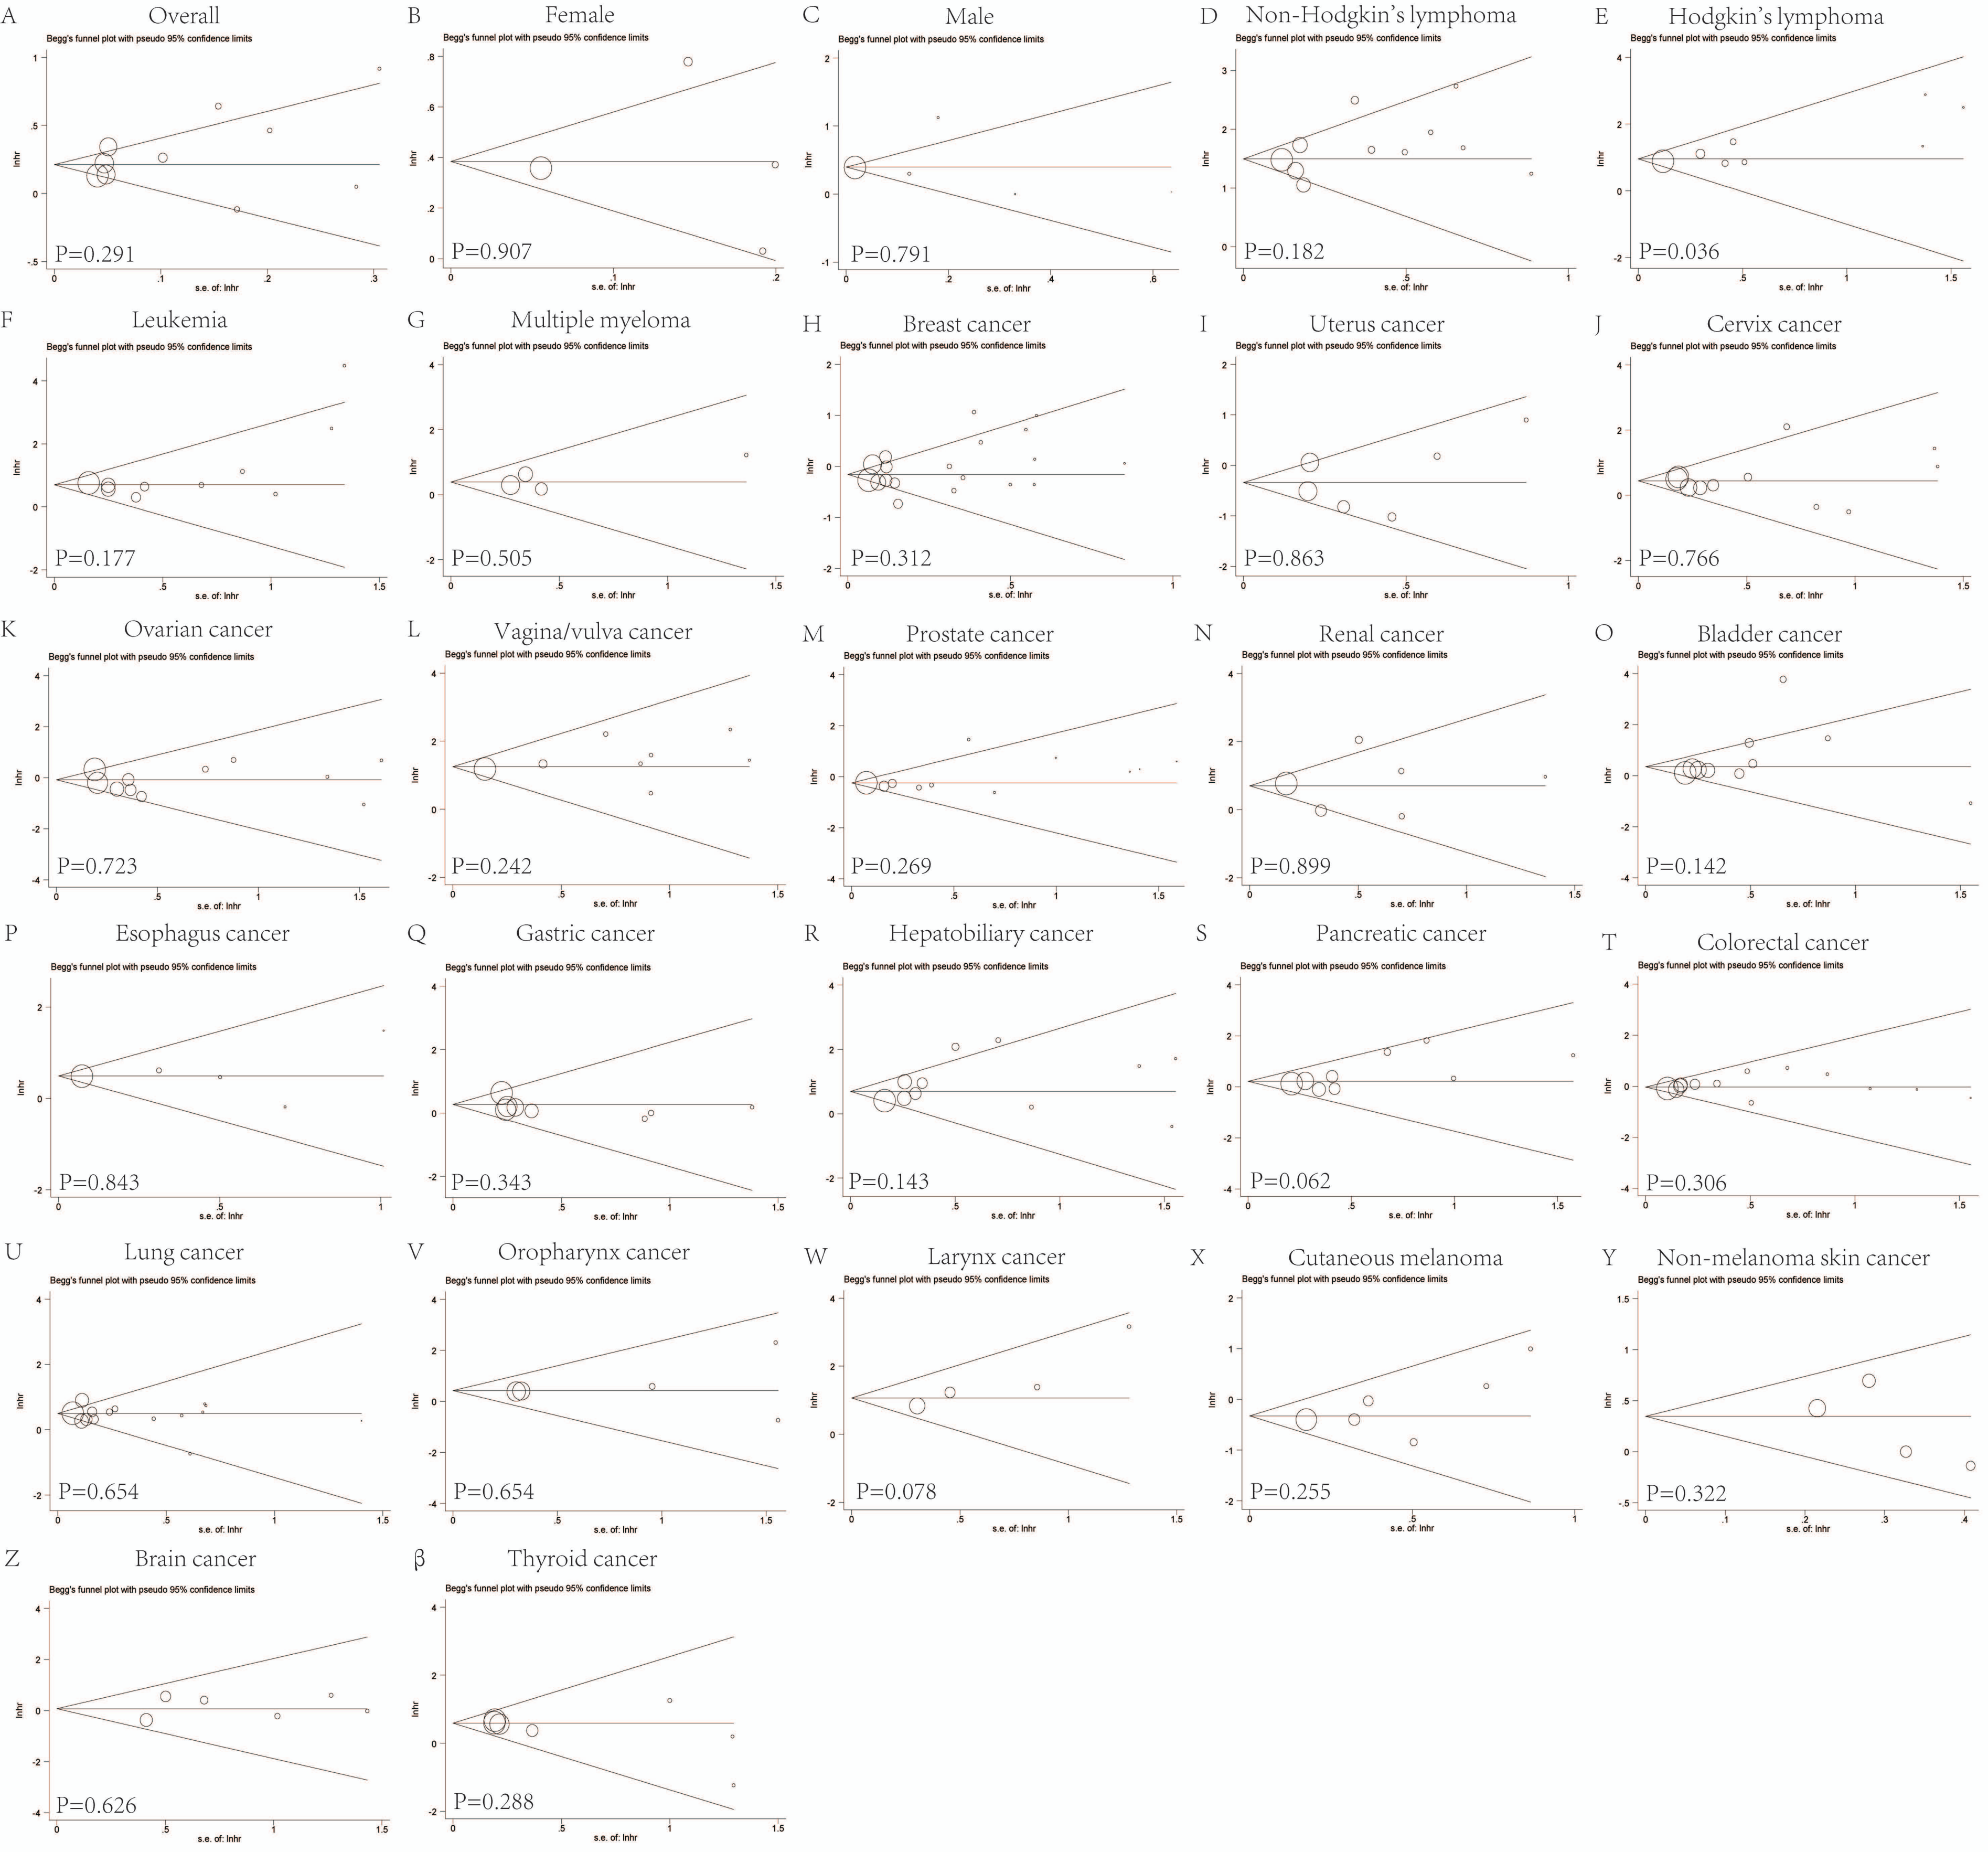

Supplement: 13075_2018_1760_MOESM4_ESM.pdf [file 13075_2018_1760_MOESM4_ESM.pdf]
